# Supplementary material for: hsa_circ_0092306 Targeting miR-197-3p Promotes Gastric Cancer Development by Regulating PRKCB in MKN-45 Cells
Source: PubMed Central journal article supplement — Mol Ther Nucleic Acids. 2019 Aug 16;18:617–26. doi: 10.1016/j.omtn.2019.08.012 (PMC6838893; doi:10.1016/j.omtn.2019.08.012), 2019-08-16
Supplement: mmc1.pdf [file mmc1.pdf]

OMTN, Volume 18

## **Supplemental Information**

**hsa\_circ\_0092306 Targeting miR-197-3p**

**Promotes Gastric Cancer Development**

**by Regulating PRKCB in MKN-45 Cells**

**Zihao Chen, Hongping Ju, Ting Zhao, Shan Yu, Ping Li, Jing Jia, Nan Li, Xiaojie Jing, Bibo Tan, and Yong Li**

**Table S1 Correlation of relative hsa\_circ\_0092306 expression with the clinicopathological characteristics of 45 patients with gastric cancer**

| Parameters            | Group                 | Cases | hsa_circ_0092306 expression |       |      |       | <i>P</i> -value |
|-----------------------|-----------------------|-------|-----------------------------|-------|------|-------|-----------------|
|                       |                       |       | Low                         | %     | High | %     |                 |
| Gender                | Male                  | 30    | 12                          | 40.00 | 18   | 60.00 | 0.5273          |
|                       | Female                | 15    | 8                           | 53.33 | 7    | 46.67 |                 |
| Age at surgery (year) | < 60                  | 16    | 9                           | 56.25 | 7    | 43.75 | 0.3484          |
|                       | ≥ 60                  | 29    | 11                          | 37.93 | 18   | 62.07 |                 |
| Tumor size (cm)       | < 3                   | 19    | 12                          | 63.16 | 7    | 36.84 | 0.0389          |
|                       | ≥ 3                   | 26    | 8                           | 30.77 | 18   | 69.23 |                 |
| Histological grade    | Well                  | 27    | 8                           | 29.63 | 19   | 70.37 | 0.0307          |
|                       | Moderately and poorly | 18    | 12                          | 66.67 | 6    | 33.33 |                 |
| TNM stage             | I, II                 | 19    | 13                          | 68.42 | 6    | 31.58 | 0.0076          |
|                       | III, IV               | 26    | 7                           | 26.92 | 19   | 73.08 |                 |
| Lymph node metastasis | Absent                | 22    | 15                          | 68.18 | 7    | 31.82 | 0.0027          |
|                       | Present               | 23    | 5                           | 21.74 | 18   | 78.26 |                 |

Notes: the mean value of hsa\_circ\_0092306 expression is set as cutoff value to differentiate the low expression or the high expression of hsa\_circ\_0092306.

**Table S2 shRNA sequence**

| Name                       | Sequence (5'-3')                                                |
|----------------------------|-----------------------------------------------------------------|
| <b>sh-hsa_circ_0092306</b> |                                                                 |
| Top Strand                 | CACCACAGGACCCGATGCAGAACATCGAAATGTTC<br>TGCATCGGGTCCTG           |
| Bottom Strand              | AAAACAGGACCCGATGCAGAACATTCGATGTTCTG<br>CATCGGGTCCTGT            |
| <b>sh-PRKCB</b>            |                                                                 |
| Top Strand                 | CACCGCGGTATGATACGTCTCTTGGCGAACCAAGAG<br>ACGTATCATACCGC          |
| Bottom Strand              | AAAAGCGGTATGATACGTCTCTTGGTTCGCCAAGAG<br>ACGTATCATACCGC          |
| <b>sh-NC</b>               |                                                                 |
| Top Strand                 | CACCTTCTCCGAACGTGTCACGTTTCAAGAGAACGT<br>GACACGTTTCGGAGAATTTTTTG |
| Bottom Strand              | GATCCAAAAAATTCTCCGAACGTGTCACGTTCTCTT<br>GAAACGTGACACGTTTCGGAGAA |

**Table S3 primer sequence for qRT-PCR**

---

| Name                    | Sequence (5'-3')               |
|-------------------------|--------------------------------|
| <b>hsa_circ_0092306</b> |                                |
| Forward Primer          | GACACAGCAAAGGAAGGGTC           |
| Reverse Primer          | CAACCTCCACCTCCTGAGTT           |
| <b>miR-197-3p</b>       |                                |
| Forward Primer          | ACACTCCAGCTGGGTTACCCACCTTCTCCA |
| Reverse Primer          | TCGTGGAGTCGGCAATTCAGTTGAGGCT   |
| <b>PRKCB</b>            |                                |
| Forward Primer          | AGCCCCACGTTTTGTGACC            |
| Reverse Primer          | GCTGGGAACATTCATCACGC           |
| <b>GAPDH</b>            |                                |
| Forward Primer          | TGTGGGCATCAATGGATTTGG          |
| Reverse Primer          | ACACCATGTATTCCGGGTCAAT         |
| <b>U6</b>               |                                |
| Forward Primer          | CTCGCTTCGGCAGCACA              |
| Reverse Primer          | AACGCTTCACGAATTTGCGT           |

---

A

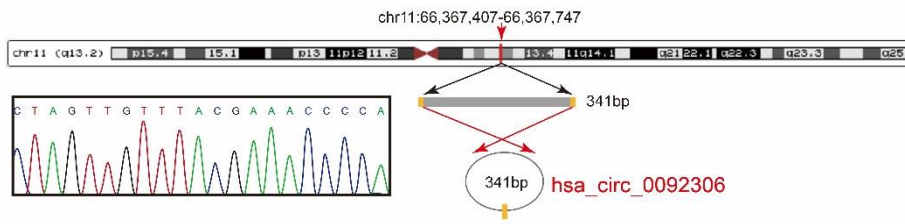

**Figure S1 (A)** The ideograph got from UCSC Genome Browser showed that the hsa\_circ\_0092306 originated from chromosome 11 and matured into 341 bp circle.

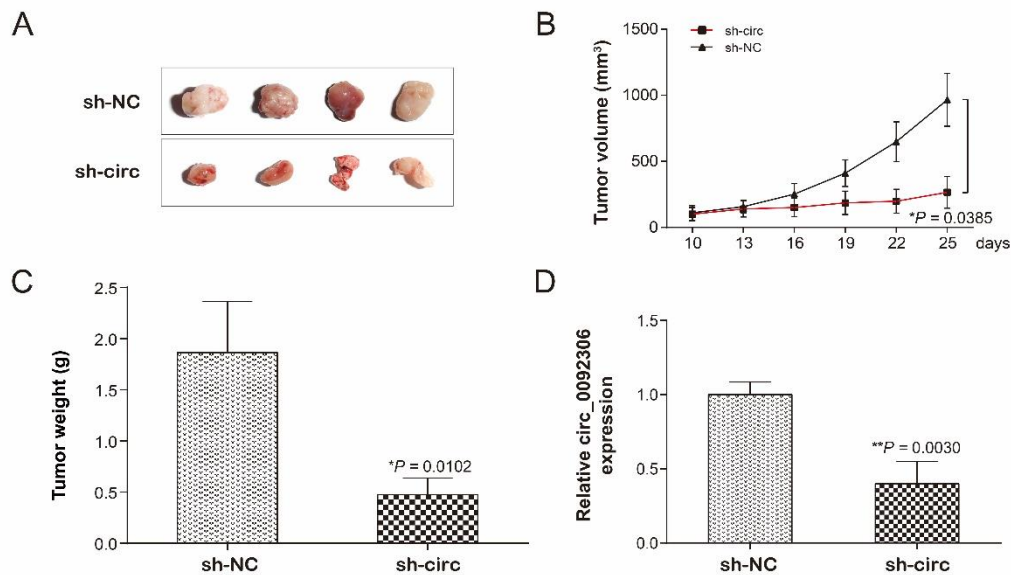

**Figure S2 The knockdown of hsa\_circ\_0092306 inhibited tumor growth *in vivo*.** (A) The actual size of the tumor showed smaller size in the hsa\_circ\_0092306 knockdown group compared with NC group. (B) Tumor growth volume was measured every 3 days after 10 days from transplantation and was significantly reduced in the hsa\_circ\_0092306 knockdown group. (C) The weight of tumor acquired from day 25 in sh-circ group was significantly decreased. (D) The hsa\_circ\_0092306 expression in the sh-circ group was lower than that in the sh-NC group. \**P* < 0.05 and \*\**P* < 0.01 meant significant statistical significances.

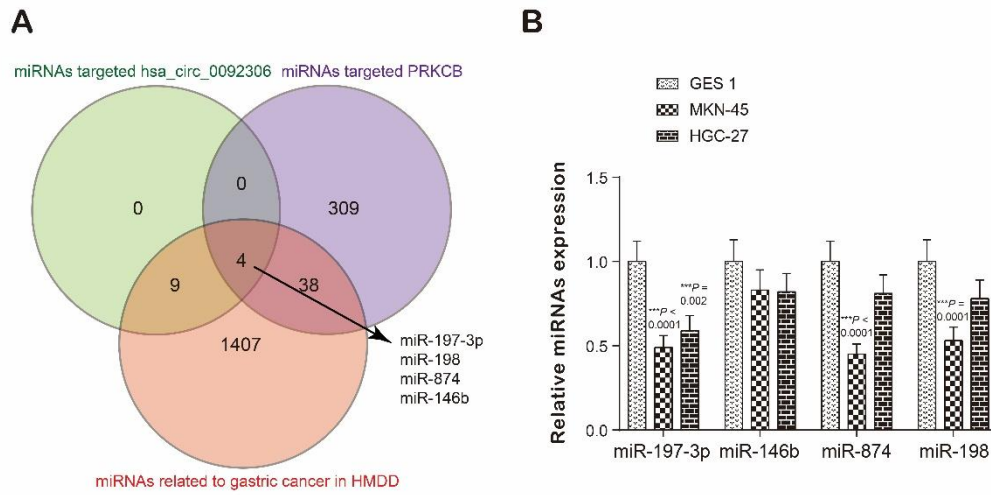

**Figure S3 MiR-197-3p was screened out for further investigation.** (A) The four miRNAs were screened out in miRNAs who targeted hsa\_circ\_0092306 and PRKCB, and related to GC in HMDD. (B) MiR-197-3p expression detected by qRT-PCR was both lower in MKN-45 and HGC-27 cells than that in GSE 1 cells. \*\*\* $P < 0.001$  meant significant statistical significances.

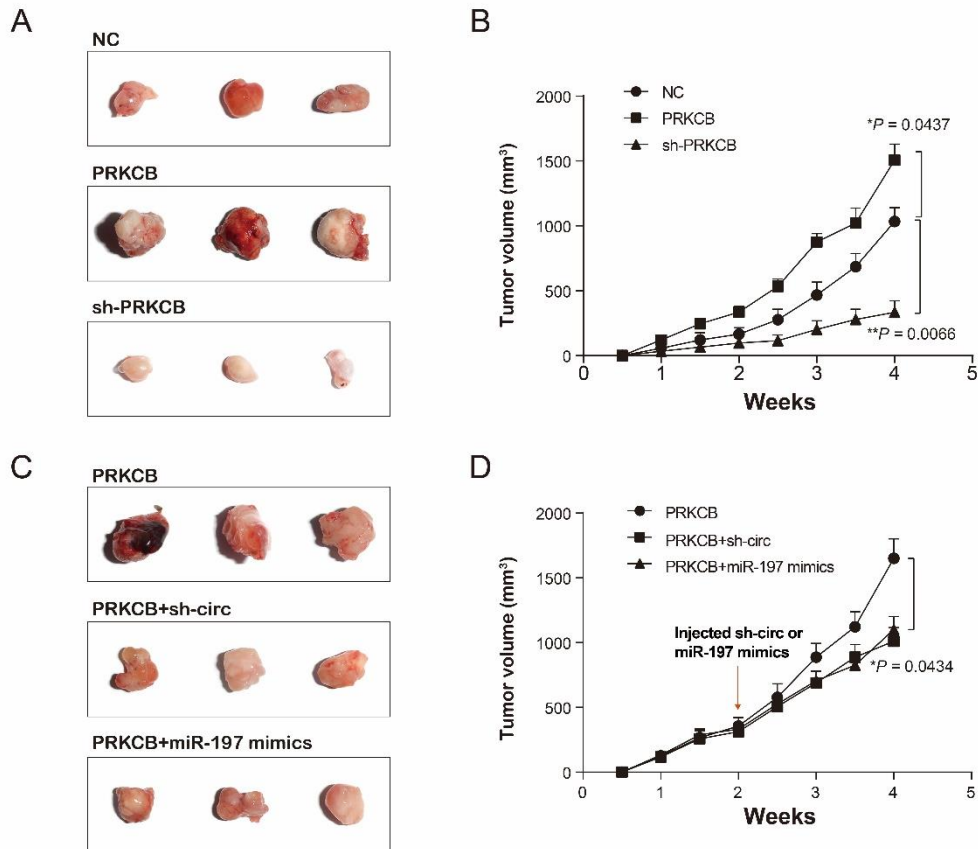

**Figure S4 Hsa\_circ\_0092306 inhibited GC growth through regulating miR-197-3p/PRKCB.**

(A-B) Tumor actual sizes and tumor growth volume curve showed PRKCB promoted GC growth *in vivo*. (C-D) Hsa\_circ\_0092306 knockdown or miR-197-3p mimics injection attenuated the growth of tumors induced by the PRKCB overexpression *in vivo*. The red arrow represented the inject time of sh-circ and miR-197-3p mimics. \*P < 0.05 and \*\*P < 0.01, compared with NC or PRKCB overexpression group, meant significant statistical significances.
